# Supplementary material for: Thrombin-Induced Microglia Activation Modulated through Aryl Hydrocarbon Receptors
Source: MDPI journal article supplement (doi:10.3390/ijms241411416), 2023-07-13
Supplement: s1 [file s1]

Supplementary data:  
Supplementary Figure S1:

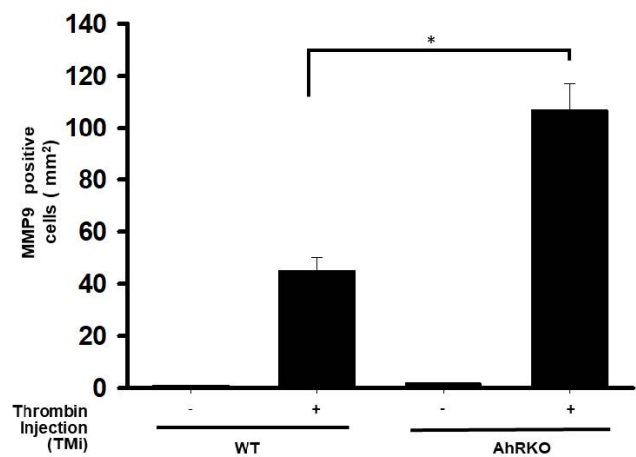

Supplementary Figure S1: The quantitative analysis in number of MMP-9 positive cells by counting the number of double staining with both Iba1 (green) and MMP 9 in the brain sections at 72 h after thrombin injection. The data was presented as number/surface area (mm<sup>2</sup>) (n=3). \*:p<0.05

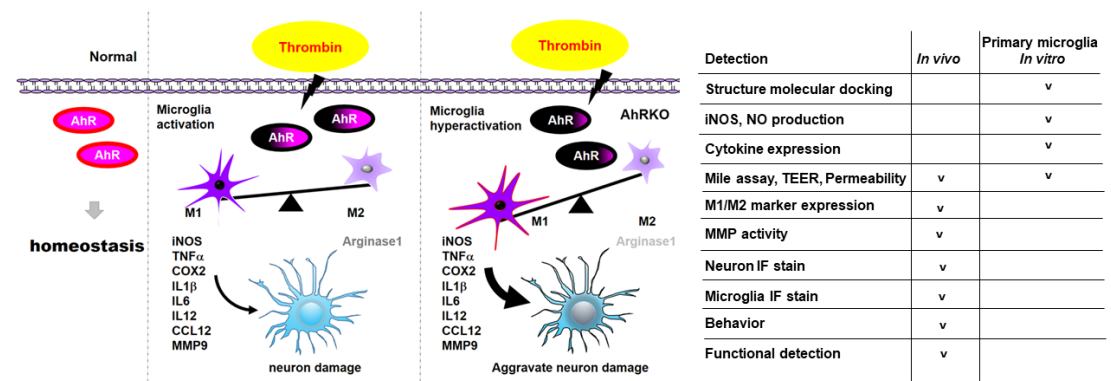

Supplementary Figure S2: The graph consisting of hypothesis of AhR involved in thrombin induced microglia cell activation and the tables of in-vitro and in-vivo experiment.

Supplementary Table S1: Sequence of primer (mouse) used for RT-PCR

| Primer         | Forward (5'-3')        | Reverse (5'-3')         |
|----------------|------------------------|-------------------------|
| iNOS           | GACATTACGACCCCTCCCAC   | GCACATGCAAGGAAGGGAAC    |
| IL-1 $\beta$   | TGCCACCTTTTGACAGTGATG  | AAGGTCCACGGGAAAGACAC    |
| TNF- $\alpha$  | TGATCGGTCCCCAAAGGGAT   | TGTCTTTGAGATCCATGCCGT   |
| IL-6           | CAACGATGATGCACTTGCAGA  | GTGACTCCAGCTTATCTCTTGGT |
| $\beta$ -actin | TGCTGTCCCTGTATGCCTCTG  | TGATGTCACGCACGATTTCC    |
| IL-12          | AGCACGGCAGCAGAATAAA    | CTCCACCTGTGAGTTCTTCAA   |
| PGE2           | GCGACATACTCAAGCAGGAGCA | AGTGGTAACCGCTCAGGTGTTG  |
| CCL2           | GCTACAAGAGGATCACCAGCAG | GTCTGGACCCATTCTTCTTGG   |
